# Supplementary material for: PNOC Expressed by B Cells in Cholangiocarcinoma Was Survival Related and LAIR2 Could Be a T Cell Exhaustion Biomarker in Tumor Microenvironment: Characterization of Immune Microenvironment Combining Single-Cell and Bulk Sequencing Technology
Source: Front Immunol. 2021 Mar 24;12:647209. doi: 10.3389/fimmu.2021.647209 (PMC8024580; doi:10.3389/fimmu.2021.647209)
Supplement: Supplementary Table 1 — Immune Infiltration Classification of Patients in Datasets of GSE26566 and GSE32225. [file Table_1.xlsx]

## Sheet: 2 group
Dataset	group	sample
GSE26566	Low Infiltration	GSM653074
GSE26566	High Infiltration	GSM653075
GSE26566	High Infiltration	GSM653076
GSE26566	Low Infiltration	GSM653077
GSE26566	High Infiltration	GSM653078
GSE26566	Low Infiltration	GSM653079
GSE26566	Low Infiltration	GSM653080
GSE26566	High Infiltration	GSM653081
GSE26566	Low Infiltration	GSM653082
GSE26566	High Infiltration	GSM653083
GSE26566	Low Infiltration	GSM653084
GSE26566	Low Infiltration	GSM653085
GSE26566	High Infiltration	GSM653086
GSE26566	Low Infiltration	GSM653087
GSE26566	Low Infiltration	GSM653088
GSE26566	High Infiltration	GSM653089
GSE26566	High Infiltration	GSM653090
GSE26566	High Infiltration	GSM653091
GSE26566	High Infiltration	GSM653092
GSE26566	High Infiltration	GSM653093
GSE26566	Low Infiltration	GSM653094
GSE26566	Low Infiltration	GSM653095
GSE26566	High Infiltration	GSM653096
GSE26566	High Infiltration	GSM653097
GSE26566	High Infiltration	GSM653098
GSE26566	Low Infiltration	GSM653099
GSE26566	Low Infiltration	GSM653100
GSE26566	Low Infiltration	GSM653101
GSE26566	Low Infiltration	GSM653102
GSE26566	Low Infiltration	GSM653103
GSE26566	Low Infiltration	GSM653104
GSE26566	Low Infiltration	GSM653105
GSE26566	High Infiltration	GSM653106
GSE26566	Low Infiltration	GSM653107
GSE26566	High Infiltration	GSM653108
GSE26566	High Infiltration	GSM653109
GSE26566	High Infiltration	GSM653110
GSE26566	High Infiltration	GSM653111
GSE26566	Low Infiltration	GSM653112
GSE26566	Low Infiltration	GSM653113
GSE26566	High Infiltration	GSM653114
GSE26566	High Infiltration	GSM653115
GSE26566	High Infiltration	GSM653116
GSE26566	High Infiltration	GSM653117
GSE26566	High Infiltration	GSM653118
GSE26566	Low Infiltration	GSM653119
GSE26566	Low Infiltration	GSM653120
GSE26566	High Infiltration	GSM653121
GSE26566	Low Infiltration	GSM653122
GSE26566	Low Infiltration	GSM653123
GSE26566	Low Infiltration	GSM653124
GSE26566	Low Infiltration	GSM653125
GSE26566	Low Infiltration	GSM653126
GSE26566	Low Infiltration	GSM653127
GSE26566	High Infiltration	GSM653128
GSE26566	Low Infiltration	GSM653129
GSE26566	Low Infiltration	GSM653130
GSE26566	Low Infiltration	GSM653131
GSE26566	High Infiltration	GSM653132
GSE26566	High Infiltration	GSM653133
GSE26566	Low Infiltration	GSM653134
GSE26566	Low Infiltration	GSM653135
GSE26566	High Infiltration	GSM653136
GSE26566	Low Infiltration	GSM653137
GSE26566	Low Infiltration	GSM653138
GSE26566	Low Infiltration	GSM653139
GSE26566	High Infiltration	GSM653140
GSE26566	Low Infiltration	GSM653141
GSE26566	Low Infiltration	GSM653142
GSE26566	High Infiltration	GSM653143
GSE26566	High Infiltration	GSM653144
GSE26566	High Infiltration	GSM653145
GSE26566	Low Infiltration	GSM653146
GSE26566	High Infiltration	GSM653147
GSE26566	Low Infiltration	GSM653148
GSE26566	Low Infiltration	GSM653149
GSE26566	Low Infiltration	GSM653150
GSE26566	Low Infiltration	GSM653151
GSE26566	Low Infiltration	GSM653152
GSE26566	Low Infiltration	GSM653153
GSE26566	Low Infiltration	GSM653154
GSE26566	Low Infiltration	GSM653155
GSE26566	Low Infiltration	GSM653156
GSE26566	High Infiltration	GSM653157
GSE26566	High Infiltration	GSM653158
GSE26566	Low Infiltration	GSM653159
GSE26566	Low Infiltration	GSM653160
GSE26566	Low Infiltration	GSM653161
GSE26566	Low Infiltration	GSM653162
GSE26566	Low Infiltration	GSM653163
GSE26566	Low Infiltration	GSM653164
GSE26566	Low Infiltration	GSM653165
GSE26566	Low Infiltration	GSM653166
GSE26566	Low Infiltration	GSM653167
GSE26566	Low Infiltration	GSM653168
GSE26566	Low Infiltration	GSM653169
GSE26566	Low Infiltration	GSM653170
GSE26566	Low Infiltration	GSM653171
GSE26566	High Infiltration	GSM653172
GSE26566	Low Infiltration	GSM653173
GSE26566	High Infiltration	GSM653174
GSE26566	High Infiltration	GSM653175
GSE26566	Low Infiltration	GSM653176
GSE26566	Low Infiltration	GSM653177
GSE32225	Low Infiltration	GSM798481
GSE32225	Low Infiltration	GSM798482
GSE32225	Low Infiltration	GSM798483
GSE32225	Low Infiltration	GSM798484
GSE32225	Low Infiltration	GSM798485
GSE32225	Low Infiltration	GSM798486
GSE32225	Low Infiltration	GSM798487
GSE32225	Low Infiltration	GSM798488
GSE32225	Low Infiltration	GSM798489
GSE32225	Low Infiltration	GSM798490
GSE32225	Low Infiltration	GSM798491
GSE32225	Low Infiltration	GSM798492
GSE32225	Low Infiltration	GSM798493
GSE32225	Low Infiltration	GSM798494
GSE32225	Low Infiltration	GSM798495
GSE32225	Low Infiltration	GSM798496
GSE32225	Low Infiltration	GSM798497
GSE32225	Low Infiltration	GSM798498
GSE32225	High Infiltration	GSM798499
GSE32225	Low Infiltration	GSM798500
GSE32225	Low Infiltration	GSM798501
GSE32225	Low Infiltration	GSM798502
GSE32225	Low Infiltration	GSM798503
GSE32225	Low Infiltration	GSM798504
GSE32225	High Infiltration	GSM798505
GSE32225	Low Infiltration	GSM798506
GSE32225	Low Infiltration	GSM798507
GSE32225	Low Infiltration	GSM798508
GSE32225	Low Infiltration	GSM798509
GSE32225	Low Infiltration	GSM798510
GSE32225	Low Infiltration	GSM798511
GSE32225	Low Infiltration	GSM798512
GSE32225	Low Infiltration	GSM798513
GSE32225	Low Infiltration	GSM798514
GSE32225	Low Infiltration	GSM798515
GSE32225	Low Infiltration	GSM798516
GSE32225	Low Infiltration	GSM798517
GSE32225	Low Infiltration	GSM798518
GSE32225	Low Infiltration	GSM798519
GSE32225	Low Infiltration	GSM798520
GSE32225	Low Infiltration	GSM798521
GSE32225	Low Infiltration	GSM798522
GSE32225	Low Infiltration	GSM798523
GSE32225	Low Infiltration	GSM798524
GSE32225	Low Infiltration	GSM798525
GSE32225	Low Infiltration	GSM798526
GSE32225	Low Infiltration	GSM798527
GSE32225	Low Infiltration	GSM798528
GSE32225	Low Infiltration	GSM798529
GSE32225	Low Infiltration	GSM798530
GSE32225	Low Infiltration	GSM798531
GSE32225	Low Infiltration	GSM798532
GSE32225	High Infiltration	GSM798533
GSE32225	High Infiltration	GSM798534
GSE32225	Low Infiltration	GSM798535
GSE32225	High Infiltration	GSM798536
GSE32225	Low Infiltration	GSM798537
GSE32225	Low Infiltration	GSM798538
GSE32225	Low Infiltration	GSM798539
GSE32225	High Infiltration	GSM798540
GSE32225	Low Infiltration	GSM798541
GSE32225	Low Infiltration	GSM798542
GSE32225	High Infiltration	GSM798543
GSE32225	Low Infiltration	GSM798544
GSE32225	Low Infiltration	GSM798545
GSE32225	High Infiltration	GSM798546
GSE32225	Low Infiltration	GSM798547
GSE32225	High Infiltration	GSM798548
GSE32225	High Infiltration	GSM798549
GSE32225	Low Infiltration	GSM798550
GSE32225	Low Infiltration	GSM798551
GSE32225	High Infiltration	GSM798552
GSE32225	High Infiltration	GSM798553
GSE32225	Low Infiltration	GSM798554
GSE32225	Low Infiltration	GSM798555
GSE32225	Low Infiltration	GSM798556
GSE32225	High Infiltration	GSM798557
GSE32225	Low Infiltration	GSM798558
GSE32225	High Infiltration	GSM798559
GSE32225	High Infiltration	GSM798560
GSE32225	Low Infiltration	GSM798561
GSE32225	Low Infiltration	GSM798562
GSE32225	Low Infiltration	GSM798563
GSE32225	Low Infiltration	GSM798564
GSE32225	Low Infiltration	GSM798565
GSE32225	Low Infiltration	GSM798566
GSE32225	Low Infiltration	GSM798567
GSE32225	Low Infiltration	GSM798568
GSE32225	Low Infiltration	GSM798569
GSE32225	High Infiltration	GSM798570
GSE32225	Low Infiltration	GSM798571
GSE32225	Low Infiltration	GSM798572
GSE32225	Low Infiltration	GSM798573
GSE32225	Low Infiltration	GSM798574
GSE32225	High Infiltration	GSM798575
GSE32225	Low Infiltration	GSM798576
GSE32225	Low Infiltration	GSM798577
GSE32225	Low Infiltration	GSM798578
GSE32225	Low Infiltration	GSM798579
GSE32225	Low Infiltration	GSM798580
GSE32225	Low Infiltration	GSM798581
GSE32225	Low Infiltration	GSM798582
GSE32225	High Infiltration	GSM798583
GSE32225	Low Infiltration	GSM798584
GSE32225	Low Infiltration	GSM798585
GSE32225	Low Infiltration	GSM798586
GSE32225	Low Infiltration	GSM798587
GSE32225	Low Infiltration	GSM798588
GSE32225	High Infiltration	GSM798589
GSE32225	Low Infiltration	GSM798590
GSE32225	High Infiltration	GSM798591
GSE32225	Low Infiltration	GSM798592
GSE32225	Low Infiltration	GSM798593
GSE32225	High Infiltration	GSM798594
GSE32225	Low Infiltration	GSM798595
GSE32225	Low Infiltration	GSM798596
GSE32225	High Infiltration	GSM798597
GSE32225	High Infiltration	GSM798598
GSE32225	High Infiltration	GSM798599
GSE32225	High Infiltration	GSM798600
GSE32225	High Infiltration	GSM798601
GSE32225	Low Infiltration	GSM798602
GSE32225	Low Infiltration	GSM798603
GSE32225	High Infiltration	GSM798604
GSE32225	Low Infiltration	GSM798605
GSE32225	High Infiltration	GSM798606
GSE32225	High Infiltration	GSM798607
GSE32225	Low Infiltration	GSM798608
GSE32225	Low Infiltration	GSM798609
GSE32225	Low Infiltration	GSM798610
GSE32225	High Infiltration	GSM798611
GSE32225	Low Infiltration	GSM798612
GSE32225	Low Infiltration	GSM798613
GSE32225	High Infiltration	GSM798614
GSE32225	Low Infiltration	GSM798615
GSE32225	Low Infiltration	GSM798616
GSE32225	High Infiltration	GSM798617
GSE32225	High Infiltration	GSM798618
GSE32225	Low Infiltration	GSM798619
GSE32225	Low Infiltration	GSM798620
GSE32225	Low Infiltration	GSM798621
GSE32225	Low Infiltration	GSM798622
GSE32225	High Infiltration	GSM798623
GSE32225	High Infiltration	GSM798624
GSE32225	Low Infiltration	GSM798625
GSE32225	High Infiltration	GSM798626
GSE32225	Low Infiltration	GSM798627
GSE32225	High Infiltration	GSM798628
GSE32225	High Infiltration	GSM798629
