# Supplementary material for: PNOC Expressed by B Cells in Cholangiocarcinoma Was Survival Related and LAIR2 Could Be a T Cell Exhaustion Biomarker in Tumor Microenvironment: Characterization of Immune Microenvironment Combining Single-Cell and Bulk Sequencing Technology
Source: Front Immunol. 2021 Mar 24;12:647209. doi: 10.3389/fimmu.2021.647209 (PMC8024580; doi:10.3389/fimmu.2021.647209)
Supplement: Supplementary Table 2 — Coefficients for LAIR2 and PNOC in Association With Treg, CD8+ T cells and B cells in Bulk Sequencing Data of CCA in TCGA Database Calculated by TIMER 2.0. [file Table_2.xlsx]

## Sheet: Sheet1
				Gene	infiltrates	rho	p	adj.p
				LAIR2	T cell regulatory (Tregs)_CIBERSORT	0.354201	0.0368344	0.0601377
					T cell regulatory (Tregs)_CIBERSORT-ABS	0.575932	0.000294306	0.000784815
					T cell regulatory (Tregs)_QUANTISEQ	0.54389	0.000732567	0.00180657
					T cell regulatory (Tregs)_XCELL	0.111221	0.524726	0.567272
				LAIR2	T cell CD8+ central memory_XCELL	0.604615	0.00011965	0.000275057
					T cell CD8+ effector memory_XCELL	0.0577547	0.741742	0.789087
					T cell CD8+ naive_XCELL	0.335897	0.0485227	0.0735193
					T cell CD8+_CIBERSORT	0.482863	0.00330339	0.00606127
					T cell CD8+_CIBERSORT-ABS	0.676919	8.00353e-06	2.16312e-05
					T cell CD8+_EPIC	0.327873	0.0545042	0.0807469
					T cell CD8+_MCPCOUNTER	0.498392	0.0023108	0.00437479
					T cell CD8+_QUANTISEQ	0.500652	0.00219065	0.00417268
					T cell CD8+_TIMER	0.0890067	0.611132	0.664274
					T cell CD8+_XCELL	0.498248	0.00231864	0.00437479
				PNOC	B cell memory_CIBERSORT	-0.014497	0.934126	0.940395
					B cell memory_CIBERSORT-ABS	0.064183	0.714142	0.740043
					B cell memory_XCELL	0.382463	0.0233603	0.0330571
					B cell naive_CIBERSORT	0.13537	0.438129	0.480961
					B cell naive_CIBERSORT-ABS	0.309358	0.0705488	0.0900622
					B cell naive_XCELL	0.294159	0.0862998	0.109471
					B cell plasma_CIBERSORT	0.328869	0.053731	0.0700839
					B cell plasma_CIBERSORT-ABS	0.410773	0.0142386	0.0209905
					B cell plasma_XCELL	0.367741	0.0297525	0.0408186
					B cell_EPIC	0.777846	3.83508e-08	9.46932e-08
					B cell_MCPCOUNTER	0.427229	0.0104746	0.0161148
					B cell_QUANTISEQ	0.524173	0.00122907	0.00214997
					B cell_TIMER	0.541196	0.000787711	0.00141083
					B cell_XCELL	0.381814	0.023616	0.0333402
					Class-switched memory B cell_XCELL	0.180329	0.299912	0.342756
